# Supplementary material for: The reaction of potassium xanthates with five-membered cyclic carbonates: selectivity of the underlying cascade reactions and mechanistic insights
Source: Royal Society of Chemistry journal article supplement (doi:10.1039/d0ra07428d), 2020-01-01
Supplement: d0ra07428d1.pdf [file d0ra07428d1.pdf]

## Supporting Information

### **The reaction of potassium xanthates with five-membered cyclic carbonates: selectivity of the underlying cascade reactions and mechanistic insights**

Misha Rumyantsev<sup>a,\*</sup>, Ilia A. Korablev<sup>a,b</sup>, Sergey Rumyantsev<sup>a</sup>

<sup>a</sup>Nizhny Novgorod State Technical University n.a. R.E. Alekseev, 24 Minin St., 603950 Nizhny Novgorod, Russia

<sup>b</sup>Lobachevsky State University of Nizhny Novgorod, 23 Prospekt Gagarina (Gagarin Avenue), 603950 Nizhny Novgorod, Russia

\*Corresponding author. 606026, Dzerzhinsk, Nizhny Novgorod region, Gaidar st., 49 Tel./fax: +7 8313 344730, E-mail address: rumih@mail2k.ru

#### **Contents:**

- |    |                                                          |    |
|----|----------------------------------------------------------|----|
| 1. | Copies of <sup>1</sup> H and <sup>13</sup> C NMR spectra | S2 |
| 2. | Calculated atomic coordinates frequencies and energies   | S5 |

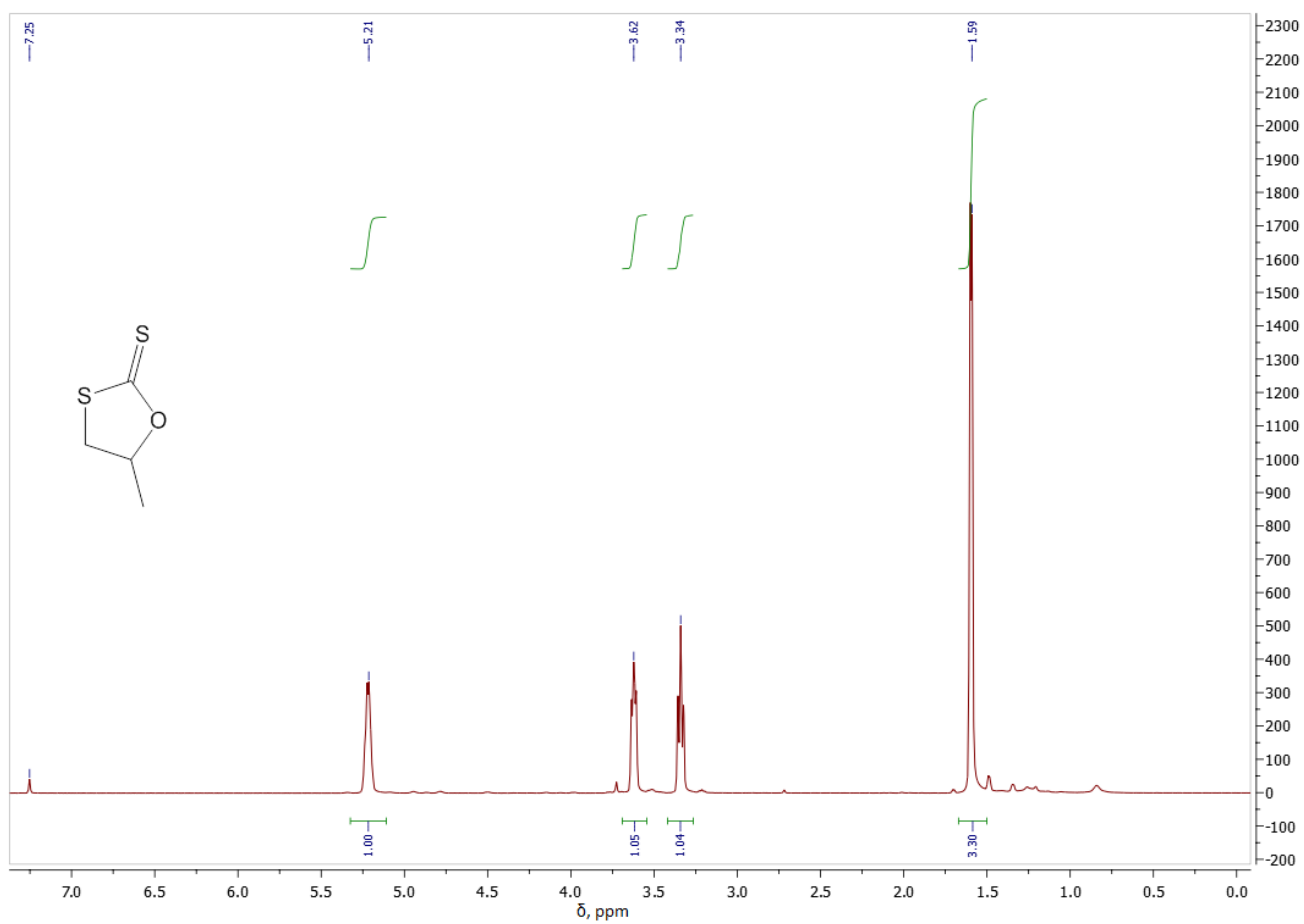

Figure S1. <sup>1</sup>H NMR spectra of 5-methyl-1,3-oxathiolane-2-thione (dithiocarbonate **IV**) (cdcl<sub>3</sub>, 25°C).

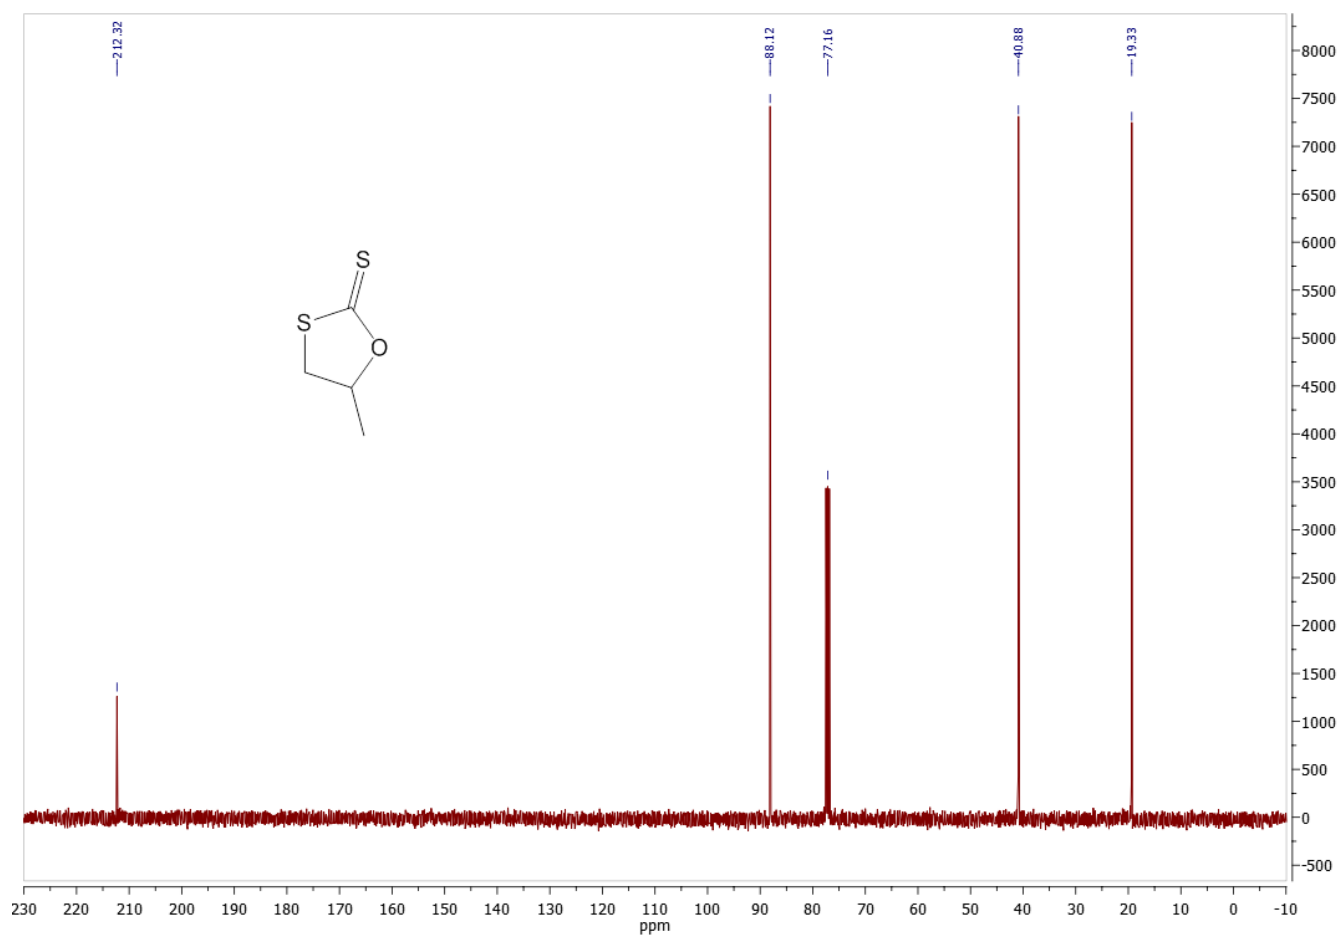

Figure S2. <sup>13</sup>C NMR spectra of 5-methyl-1,3-oxathiolane-2-thione (dithiocarbonate **IV**) (cdcl<sub>3</sub>, 25°C).

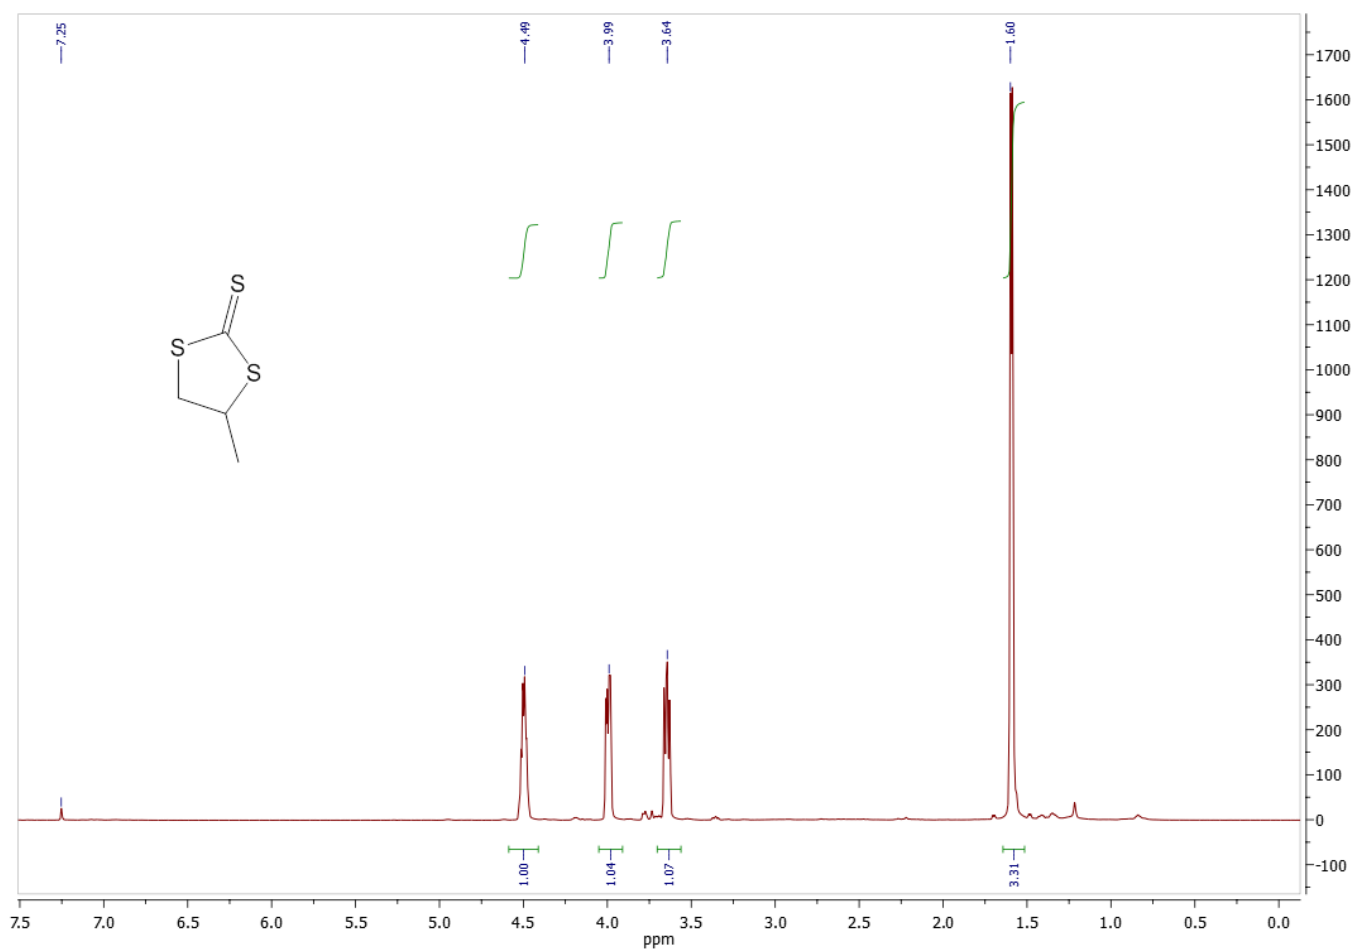

Figure S3. <sup>1</sup>H NMR spectra of 4-methyl-1,3-dithiolane-2-thione (trithiocarbonate) (cdcl<sub>3</sub>, 25°C).

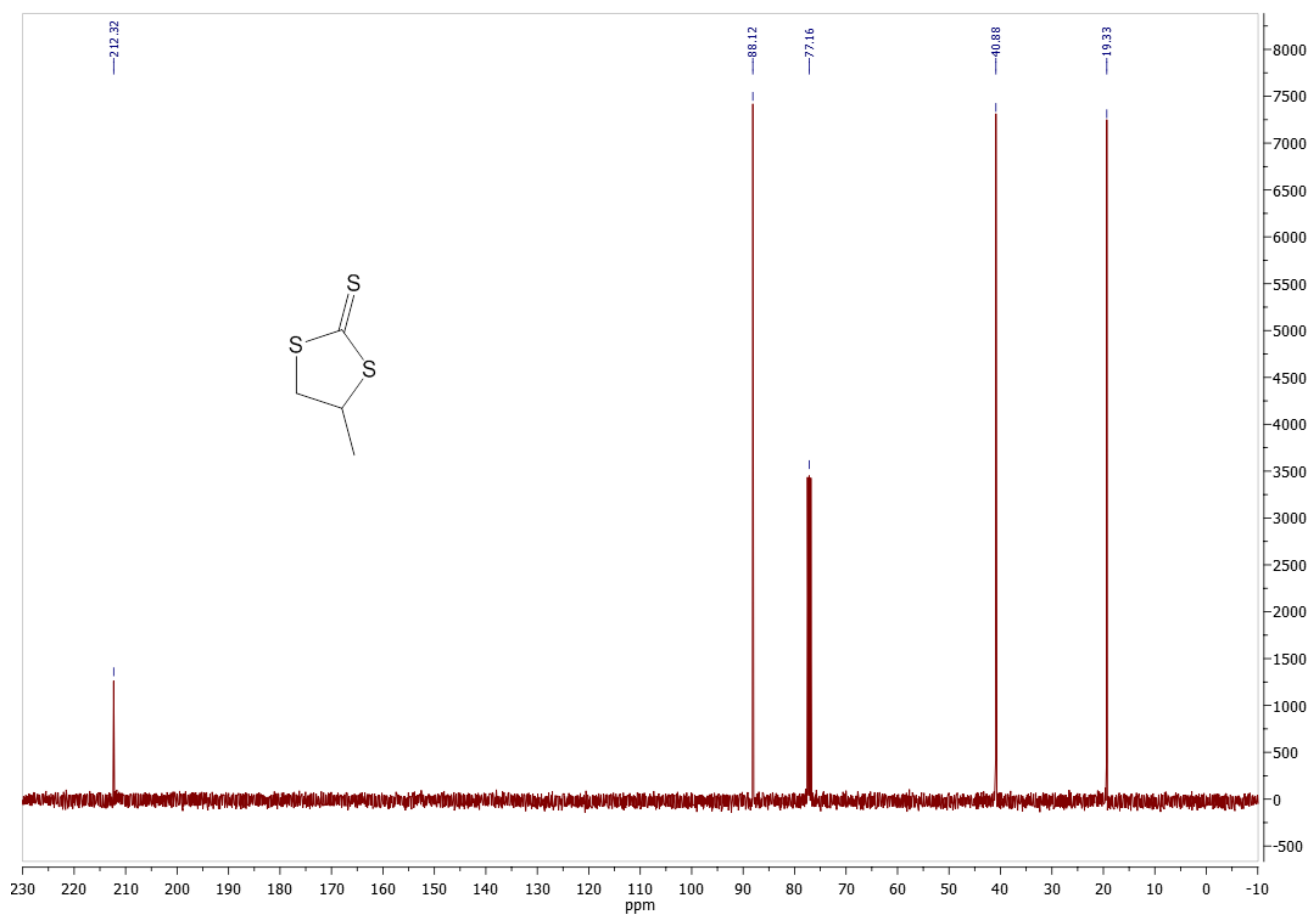

Figure S4. <sup>13</sup>C NMR spectra of 4-methyl-1,3-dithiolane-2-thione (trithiocarbonate) (cdCl<sub>3</sub>, 25°C).

## Calculated atomic coordinates, frequencies and energies

### Potassium propane-1,2-bis(olate) (Figure 7)

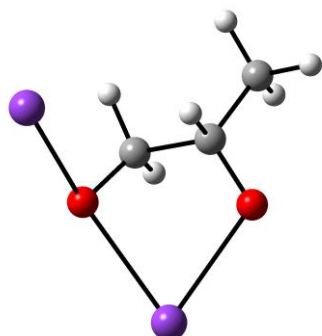

atomic coordinates:

K<sub>2</sub>C<sub>3</sub>H<sub>6</sub>O<sub>2</sub>

|   |              |              |              |
|---|--------------|--------------|--------------|
| C | 0.000000000  | 0.000000000  | 0.000000000  |
| H | 0.000000000  | 0.000000000  | 1.131015000  |
| C | 1.502154000  | 0.000000000  | -0.390702000 |
| H | 1.930791000  | -0.974905000 | -0.027553000 |
| H | 1.515141000  | -0.095727000 | -1.506872000 |
| C | -0.627573000 | -1.344559000 | -0.414172000 |
| H | -0.128848000 | -2.207753000 | 0.047340000  |
| H | -1.685425000 | -1.364671000 | -0.131880000 |
| H | -0.571432000 | -1.455972000 | -1.505140000 |
| O | -0.689363000 | 1.071697000  | -0.501144000 |
| K | 0.914057000  | 2.906153000  | -1.213176000 |
| K | 2.548843000  | 0.306384000  | 2.438992000  |
| O | 2.226229000  | 1.088685000  | 0.057311000  |

|                                              |                             |
|----------------------------------------------|-----------------------------|
| Zero-point correction=                       | 0.088405 (Hartree/Particle) |
| Thermal correction to Energy=                | 0.097873                    |
| Thermal correction to Enthalpy=              | 0.098817                    |
| Thermal correction to Gibbs Free Energy=     | 0.051324                    |
| Sum of electronic and zero-point Energies=   | -1468.044083                |
| Sum of electronic and thermal Energies=      | -1468.034615                |
| Sum of electronic and thermal Enthalpies=    | -1468.033671                |
| Sum of electronic and thermal Free Energies= | -1468.081164                |

Number of imaginary frequencies = 0

Lowest frequency = 42.0332

### Potassium 1-sulfidopropan-2-olate (Figure 7)

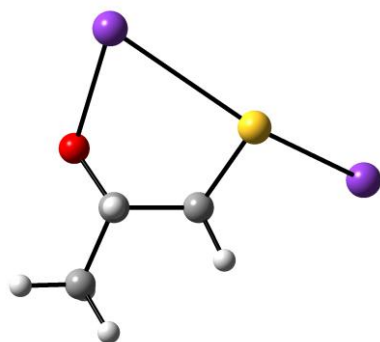

atomic coordinates:

K2C3H6SO

|   |              |              |              |
|---|--------------|--------------|--------------|
| C | 0.239005000  | 0.048982000  | -0.189075000 |
| H | -0.135397000 | 0.341936000  | 0.831149000  |
| C | 1.714145000  | -0.359097000 | 0.041277000  |
| H | 1.750160000  | -1.155366000 | 0.794854000  |
| H | 2.086629000  | -0.810284000 | -0.893674000 |
| C | -0.562610000 | -1.208315000 | -0.567854000 |
| H | -0.480297000 | -2.001272000 | 0.185807000  |
| H | -1.619899000 | -0.952144000 | -0.690326000 |
| H | -0.197715000 | -1.600370000 | -1.525951000 |
| O | 0.078142000  | 1.059141000  | -1.108216000 |
| S | 2.841541000  | 1.005418000  | 0.569211000  |
| K | 0.324271000  | 2.919329000  | 0.671326000  |
| K | 2.212480000  | 1.478438000  | -2.471453000 |

|                                              |                             |
|----------------------------------------------|-----------------------------|
| Zero-point correction=                       | 0.088030 (Hartree/Particle) |
| Thermal correction to Energy=                | 0.097674                    |
| Thermal correction to Enthalpy=              | 0.098618                    |
| Thermal correction to Gibbs Free Energy=     | 0.051712                    |
| Sum of electronic and zero-point Energies=   | -1791.046894                |
| Sum of electronic and thermal Energies=      | -1791.037250                |
| Sum of electronic and thermal Enthalpies=    | -1791.036306                |
| Sum of electronic and thermal Free Energies= | -1791.083212                |

Number of imaginary frequencies = 0

Lowest frequency = 70.2560

### Initial structure used for the scan depicted in Figure 7

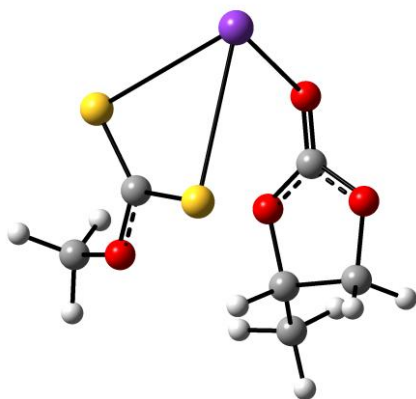

atomic coordinates:

KC6H9S2O4

|   |              |              |              |
|---|--------------|--------------|--------------|
| C | -0.236412000 | -0.102408000 | 0.053041000  |
| K | -1.128359000 | -0.299754000 | 3.456476000  |
| H | 5.033578000  | 1.021937000  | 0.691583000  |
| C | 4.428778000  | 0.572849000  | -0.101166000 |
| H | 4.070267000  | 1.359926000  | -0.768179000 |
| H | 4.700982000  | -1.194231000 | 1.827141000  |
| O | 2.440347000  | 0.699587000  | 1.271111000  |
| H | 5.057804000  | -0.109224000 | -0.679992000 |
| C | 2.149254000  | 0.146800000  | 2.446244000  |
| C | 3.266746000  | -0.193697000 | 0.486059000  |
| C | 3.657505000  | -1.271375000 | 1.511615000  |
| H | 3.433608000  | -2.280791000 | 1.167974000  |
| H | 2.615703000  | -0.604282000 | -0.288608000 |
| S | -0.014332000 | -1.642990000 | 0.756676000  |
| O | 2.825626000  | -0.987339000 | 2.646642000  |
| O | 1.387150000  | 0.621650000  | 3.255472000  |
| S | -1.291051000 | 1.105911000  | 0.598454000  |
| O | 0.534612000  | 0.099954000  | -1.026246000 |
| C | 0.562220000  | 1.374609000  | -1.671178000 |
| H | 0.887060000  | 2.144099000  | -0.967085000 |
| H | 1.280466000  | 1.264272000  | -2.482903000 |
| H | -0.424748000 | 1.629774000  | -2.061471000 |

Zero-point correction= 0.156902 (Hartree/Particle)

Thermal correction to Energy= 0.172551

Thermal correction to Enthalpy= 0.173495

Thermal correction to Gibbs Free Energy= 0.110921

Sum of electronic and zero-point Energies= -1930.922311

Sum of electronic and thermal Energies= -1930.906662

Sum of electronic and thermal Enthalpies= -1930.905718

Sum of electronic and thermal Free Energies= -1930.968292

Number of imaginary frequencies = 0

Lowest frequency = 35.7688



### Initial structure used for the scan depicted in Figure 8

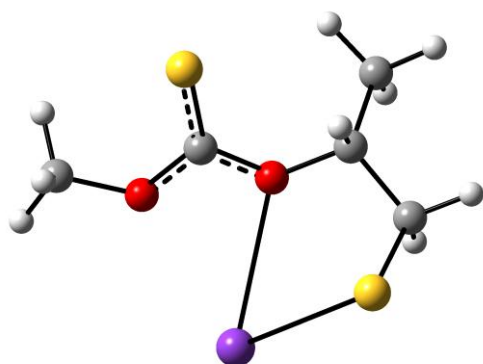

atomic coordinates:

KC5H9S2O2

|   |              |              |              |
|---|--------------|--------------|--------------|
| C | 0.014033000  | -0.002494000 | 0.016507000  |
| S | 0.013347000  | -0.070298000 | 1.666817000  |
| O | 1.097978000  | 0.021821000  | -0.758305000 |
| C | 2.394965000  | -0.056493000 | -0.150317000 |
| H | 2.485799000  | -0.987474000 | 0.410512000  |
| H | 2.547859000  | 0.795181000  | 0.513486000  |
| H | 3.096550000  | -0.034256000 | -0.981280000 |
| C | -2.388219000 | 0.155051000  | -0.280592000 |
| H | -2.341728000 | 0.760288000  | 0.628526000  |
| O | -1.022337000 | 0.049967000  | -0.792034000 |
| C | -2.901141000 | -1.245636000 | 0.006705000  |
| H | -2.278259000 | -1.749492000 | 0.749166000  |
| H | -3.920000000 | -1.183319000 | 0.397858000  |
| H | -2.917218000 | -1.839418000 | -0.912128000 |
| C | -3.183046000 | 0.877561000  | -1.356207000 |
| H | -4.221493000 | 0.895101000  | -1.008637000 |
| H | -3.167614000 | 0.257541000  | -2.262528000 |
| S | -2.612544000 | 2.583114000  | -1.710932000 |
| K | -0.020095000 | 1.482453000  | -3.002343000 |

Zero-point correction= 0.141726 (Hartree/Particle)  
Thermal correction to Energy= 0.154411  
Thermal correction to Enthalpy= 0.155356  
Thermal correction to Gibbs Free Energy= 0.100811  
Sum of electronic and zero-point Energies= -1742.398373  
Sum of electronic and thermal Energies= -1742.385688  
Sum of electronic and thermal Enthalpies= -1742.384743  
Sum of electronic and thermal Free Energies= -1742.439289

Number of imaginary frequencies = 0

Lowest frequency = 37.5732
